# Supplementary material
Source: PubMed Central journal article supplement (PMC4740205)
Supplement: NIHMS741248-supplement-307767DR2_Acknowledgment_Permission.pdf [file NIHMS741248-supplement-307767DR2_Acknowledgment_Permission.pdf]

11/23/2015

**Circulation Research**

**CIRCRES/2015/307767DR1**

**From: Roger Babbitt**

**To: Editorial Board – Circulation Research**

**Subject: Acknowledgment Permissions**

Dear Editor,

I hereby express my permission to be acknowledged in the Cir Res paper by Jan R. Kraehling.

  
\_\_\_\_\_
